# Supplementary material
Source: PubMed Central journal article supplement (PMC2999843)
Supplement: NIHMS252464-supplement-Supplement_figure.pdf [file NIHMS252464-supplement-Supplement_figure.pdf]

**Supplemental Table 1.** Comparison of normal diet (2018SX), ketogenic diet (D07091701), and AIN-93G standards (Reeves et al., 1993).

| <b>Diet</b>           | <b>Norm (2018SX)</b> | <b>Keto (D07091701)</b> | <b>AIN-93G</b> |
|-----------------------|----------------------|-------------------------|----------------|
|                       |                      | kcal%                   |                |
| Protein               | 23                   | 7                       | —              |
| Carbohydrate          | 60                   | 0                       | —              |
| Fat                   | 17                   | 93                      | —              |
| kcal/g                | 3.3                  | 6.1                     | —              |
| <b>Vitamins</b>       |                      | amount (gm)/kg          |                |
| Biotin                | 0.0008               | 0.00034                 | 0.00020        |
| Folic Acid            | 0.0084               | 0.0034                  | 0.0020         |
| Vitamin K             | 0.102                | 0.0009                  | 0.0008         |
| Niacin                | 0.0873               | 0.0508                  | 0.0300         |
| Pantothenic Acid      | 0.1416               | 0.0271                  | 0.0160         |
| Pyridoxine HCl        | 0.0268               | 0.0119                  | 0.0070         |
| Riboflavin            | 0.0272               | 0.0102                  | 0.0060         |
| Thiamine HCl          | 0.118                | 0.0102                  | 0.0060         |
| Vitamin A Acetate, IU | 30700                | 6800.0                  | 4000.0         |
| Vitamin B12           | 0.00015              | 0.0000169               | 0.0000250      |
| Vitamin D3, IU        | 2100                 | 1690.0                  | 1000.0         |
| Vitamin E Acetate, IU | 128                  | 84.8                    | 75.0           |
| <b>Minerals</b>       |                      |                         |                |
| Ca                    | 10                   | 10.2                    | 5.0            |
| P                     | 6.5                  | 5.1                     | 3.2            |
| Cr                    | 0.0005               | 0.0034                  | 0.0010         |
| Cu                    | 0.015                | 0.010                   | 0.006          |
| Fe                    | 0.225                | 0.076                   | 0.045          |
| Mg                    | 2                    | 0.85                    | 0.50           |
| Mn                    | 0.118                | 0.1                     | 0.0105         |
| K                     | 6.8                  | 10.2                    | 3.6            |
| I                     | 0.012                | 0.000339                | 0.000200       |
| Na                    | 2.3                  | 1.7                     | 1.0            |
| Se                    | 0.0002               | 0.0003                  | 0.0002         |
| Zn                    | 0.077                | 0.049                   | 0.030          |

**Supplemental Table 2.** Data for 6 Hz test

| Current<br>(mA) | Diet   | All mice                        |                          | Weight-matched<br>mice          |                          |
|-----------------|--------|---------------------------------|--------------------------|---------------------------------|--------------------------|
|                 |        | No. of<br>mice with<br>seizures | No. of<br>mice<br>tested | No. of<br>mice with<br>seizures | No. of<br>mice<br>tested |
| 6               | Normal | 0                               | 6                        | 0                               | 6                        |
| 8               | Normal | 2                               | 12                       | 2                               | 12                       |
| 9               | Normal | 3                               | 6                        | 3                               | 6                        |
| 10              | Normal | 8                               | 12                       | 8                               | 12                       |
| 13              | Normal | 7                               | 7                        | 7                               | 7                        |
| 6               | CR-D   | 0                               | 7                        | 0                               | 7                        |
| 7               | CR-D   | 0                               | 6                        | 0                               | 6                        |
| 8               | CR-D   | 4                               | 9                        | 4                               | 9                        |
| 9               | CR-D   | 8                               | 8                        | 7                               | 7                        |
| 10              | CR-D   | 6                               | 7                        | 6                               | 6                        |
| 12              | CR-D   | 7                               | 7                        | 7                               | 7                        |
| 6               | CR-IF  | 1                               | 15                       | 0                               | 11                       |
| 7               | CR-IF  | 3                               | 6                        | 2                               | 5                        |
| 8               | CR-IF  | 9                               | 19                       | 8                               | 18                       |
| 9               | CR-IF  | 6                               | 6                        | 5                               | 5                        |
| 10              | CR-IF  | 17                              | 18                       | 15                              | 16                       |
| 12              | CR-IF  | 7                               | 7                        | 6                               | 6                        |
| 13              | CR-IF  | 1                               | 1                        | 0                               | 0                        |
| 8               | Keto   | 0                               | 7                        | 0                               | 4                        |
| 10              | Keto   | 2                               | 9                        | 1                               | 6                        |
| 11              | Keto   | 8                               | 15                       | 5                               | 9                        |
| 12              | Keto   | 4                               | 6                        | 4                               | 6                        |
| 13              | Keto   | 8                               | 10                       | 5                               | 6                        |
| 16              | Keto   | 5                               | 6                        | 2                               | 2                        |
| 20              | Keto   | 5                               | 5                        | 4                               | 4                        |

**Supplemental Table 3.** Data for MES threshold test

| Current<br>(mA) | Diet   | All mice                  |                    | Weight-matched mice       |                    |
|-----------------|--------|---------------------------|--------------------|---------------------------|--------------------|
|                 |        | No. of mice with seizures | No. of mice tested | No. of mice with seizures | No. of mice tested |
| 4               | Normal | 0                         | 8                  | 0                         | 8                  |
| 5               | Normal | 0                         | 9                  | 0                         | 9                  |
| 6               | Normal | 6                         | 9                  | 6                         | 9                  |
| 8               | Normal | 9                         | 9                  | 9                         | 9                  |
| 3               | CR-IF  | 2                         | 6                  | 0                         | 2                  |
| 4               | CR-IF  | 2                         | 6                  | 1                         | 5                  |
| 5               | CR-IF  | 4                         | 6                  | 3                         | 4                  |
| 6               | CR-IF  | 6                         | 6                  | 3                         | 3                  |
| 3               | Keto   | 0                         | 6                  | 0                         | 6                  |
| 4               | Keto   | 0                         | 6                  | 0                         | 5                  |
| 5               | Keto   | 1                         | 6                  | 1                         | 3                  |
| 6               | Keto   | 4                         | 6                  | 3                         | 4                  |
| 8               | Keto   | 5                         | 5                  | 2                         | 2                  |

**Supplemental Table 4.** Complete blood count results for unrestricted normal diet (Norm) and intermittent fasting (CR-IF) groups.

|                 | units               | Norm |      |   | CR-IF |       |   | Significance   |
|-----------------|---------------------|------|------|---|-------|-------|---|----------------|
|                 |                     | Mean | SEM  | N | Mean  | SEM   | N | level          |
| <b>WBC</b>      | 10 <sup>3</sup> /uL | 2.6  | 0.17 | 9 | 1.8   | 0.31  | 6 | t-test<br>0.06 |
| <b>Hgb</b>      | g/dl                | 12.5 | 0.28 | 9 | 13.2  | 0.68  | 6 | 0.38           |
| <b>Hct</b>      | %                   | 44.3 | 1.4  | 9 | 43.6  | 2.7   | 6 | 0.84           |
| <b>MCV</b>      | fL                  | 56.1 | 0.79 | 9 | 54.2  | 0.87  | 6 | 0.13           |
| <b>Platelet</b> | 10 <sup>3</sup> /uL | 1000 | 199  | 8 | 892   | 237.4 | 5 | 0.74           |

**Supplemental Table 5.** Comprehensive metabolic panel results for unrestricted normal diet (Norm) and intermittent fasting (CR-IF) groups.

|                   |         |      | Norm |    |       | CR-IF |    |                | Significance level |
|-------------------|---------|------|------|----|-------|-------|----|----------------|--------------------|
|                   | units   | Mean | SEM  | N  | Mean  | SEM   | N  | <i>t</i> -test |                    |
| <b>Na</b>         | mEq/L   | 146  | 0.62 | 10 | 148   | 0.3   | 9  | 0.02           |                    |
| <b>K</b>          | mEq/L   | 8.7  | 0.87 | 10 | 9.8   | 0.5   | 9  | 0.25           |                    |
| <b>Cl</b>         | mEq/L   | 106  | 1.9  | 10 | 108   | 0.71  | 9  | 0.27           |                    |
| <b>CO2</b>        | mEq/L   | 18.5 | 0.87 | 11 | 17.4  | 1.4   | 13 | 0.48           |                    |
| <b>BUN</b>        | mg/dL   | 21.5 | 1.4  | 11 | 30    | 1.5   | 13 | 0.0004         |                    |
| <b>Cr</b>         | mg/dL   | 1.9  | 1.7  | 7  | 2.4   | 1.5   | 7  | 0.82           |                    |
| <b>total</b>      |         |      |      |    |       |       |    |                |                    |
| <b>protein</b>    | g/dL    | 5.2  | 0.16 | 10 | 5.4   | 0.13  | 11 | 0.32           |                    |
| <b>Albumin</b>    | g/dL    | 2.8  | 0.04 | 11 | 3.3   | 0.08  | 13 | 0.00003        |                    |
| <b>ALT</b>        | U/L     | 51   | 6.6  | 11 | 75    | 8.9   | 12 | 0.04           |                    |
| <b>AST</b>        | U/L     | 283  | 49   | 11 | 331   | 69    | 13 | 0.57           |                    |
| <b>alk phos</b>   | U/L     | 151  | 7.7  | 11 | 149   | 7.5   | 13 | 0.82           |                    |
| <b>bili T</b>     | mg/dL   | 0.15 | 0.05 | 11 | 0.22  | 0.06  | 13 | 0.36           |                    |
| <b>bili D</b>     | mg/dL   | 0.15 | 0.05 | 11 | 0.15  | 0.05  | 13 | 0.9            |                    |
| <b>Amylase</b>    | U/L     | 1417 | 141  | 11 | 1512  | 100   | 13 | 0.56           |                    |
| <b>Lipase</b>     | U/L     | 93   | 10   | 11 | 85    | 8.6   | 11 | 0.5            |                    |
| <b>Chol</b>       | mg/dL   | 136  | 13   | 11 | 150   | 5.8   | 13 | 0.78           |                    |
| <b>Trig</b>       | mg/dL   | 125  | 11   | 11 | 124   | 11    | 11 | 0.93           |                    |
| <b>Ca</b>         | mg/dL   | 8.8  | 0.69 | 11 | 9.8   | 0.14  | 11 | 0.13           |                    |
| <b>Phos</b>       | mg/dL   | 11   | 1.1  | 11 | 11.4  | 0.4   | 13 | 0.69           |                    |
| <b>Mg</b>         | mg/dL   | 2.5  | 0.41 | 11 | 3.3   | 0.19  | 8  | 0.41           |                    |
| <b>Osm (calc)</b> | mOsm/kg | 328  | 2.6  | 11 | 335   | 1.6   | 9  | 0.02           |                    |
| <b>CK</b>         | U/L     | 9543 | 2516 | 8  | 10012 | 3403  | 13 | 0.91           |                    |
