# Supplementary material
Source: PubMed Central journal article supplement (PMC2999843)
Supplement: NIHMS252464-supplement-supplement_table.pdf [file NIHMS252464-supplement-supplement_table.pdf]

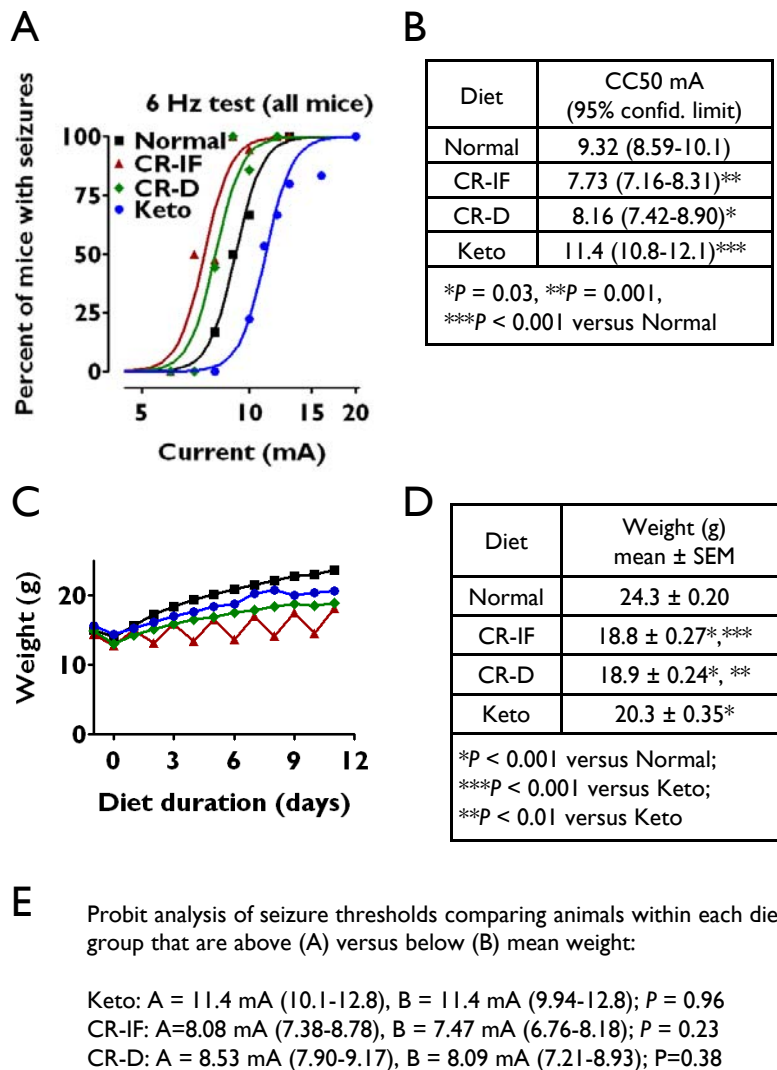

**Figure S1. Calorie restriction (intermittent and daily) and the ketogenic diet have opposite effects on 6 Hz-induced seizures.** (A) Probability of seizure events at the indicated currents was determined by a probit analysis. Results presented are for all mice fed normal rodent chow without restriction (Norm,  $n = 43$  mice), mice fasted (24h) and fed unrestricted normal rodent chow (24h) on alternate days (CR-IF,  $n = 72$ ), mice fed restricted amounts of normal rodent chow daily (CR-D,  $n = 44$ ), and mice fed the ketogenic diet (Keto,  $n = 58$ ), tested in 3-4 independent animal cohorts in 3-4 independent experiments. Because the curves shown represent a probability function, not all points lie on the curve. (B) The current where 50% of mice had convulsions (CC50) was derived from data in panel A. (C) Weights of animals shown in panel A through day 11 (before animals were removed from each set for testing on days 11-13). (D) Body weights on the day of seizure testing for all mice in panel A, mean  $\pm$ SEM; analyzed by one-way ANOVA with Tukey's multiple comparison test. (E) Probit analysis of seizure thresholds comparing animals within each diet group that are above (A) versus below (B) mean weight.

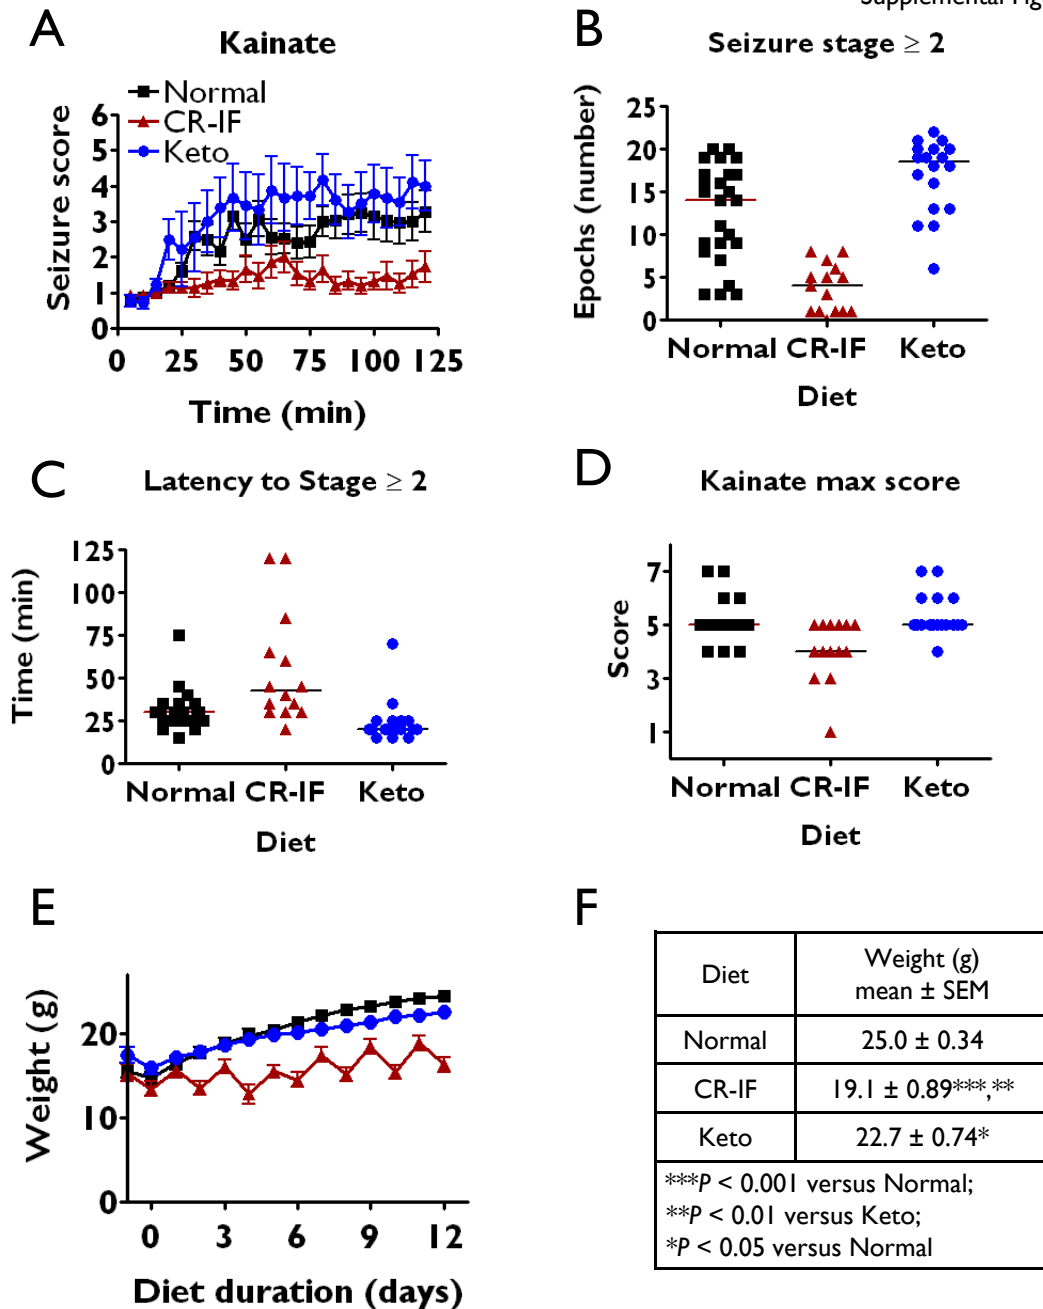

**Figure S2. Intermittent fasting (CR-IF), but not the ketogenic diet, protects against seizures induced by kainic acid injected intraperitoneally (ip).** (A) Mean seizure scores (+SEM) were assessed in 5 min blocks for two groups of all mice tested independently. Mice were fed as described for Figure 1; (Norm,  $n = 25$  mice; CR-IF,  $n = 14$ ; Keto,  $n = 18$ ). (B) Number of 5-min blocks spent in seizure stage  $\geq 2$  for animals in panel A (Normal versus CR-IF & CR-IF versus Keto,  $P < 0.001$ ; Normal versus Keto,  $P < 0.05$ ; analyzed by one-way ANOVA with Tukey's multiple comparison test). Bar represents the group median. (C) Latency to seizure score  $\geq 2$  (bar represents group median) for animals in panel A (Normal versus CR-IF & Normal versus Keto,  $P < 0.05$ ; CR-IF versus Keto,  $P < 0.001$ ; analyzed by Kruskal-Wallis test with Dunn's multiple comparison test). Bar represents the group median. (D) Maximum seizure scores for mice in panel A (CR-IF versus Keto,  $P < 0.001$ ; Normal versus CR-IF,  $P < 0.01$ ; Normal versus Keto,  $P > 0.05$ ; analyzed by Kruskal-Wallis test with Dunn's multiple comparison test). Bar represents the group median. (E) Weight of animals shown in panel A (until the first animals were removed for seizure testing). (F) Body weights on the day of seizure testing for mice in panel A, mean +SEM; analyzed by one-way ANOVA with Tukey's multiple comparison test.

# ivKA test (corrected for weight)

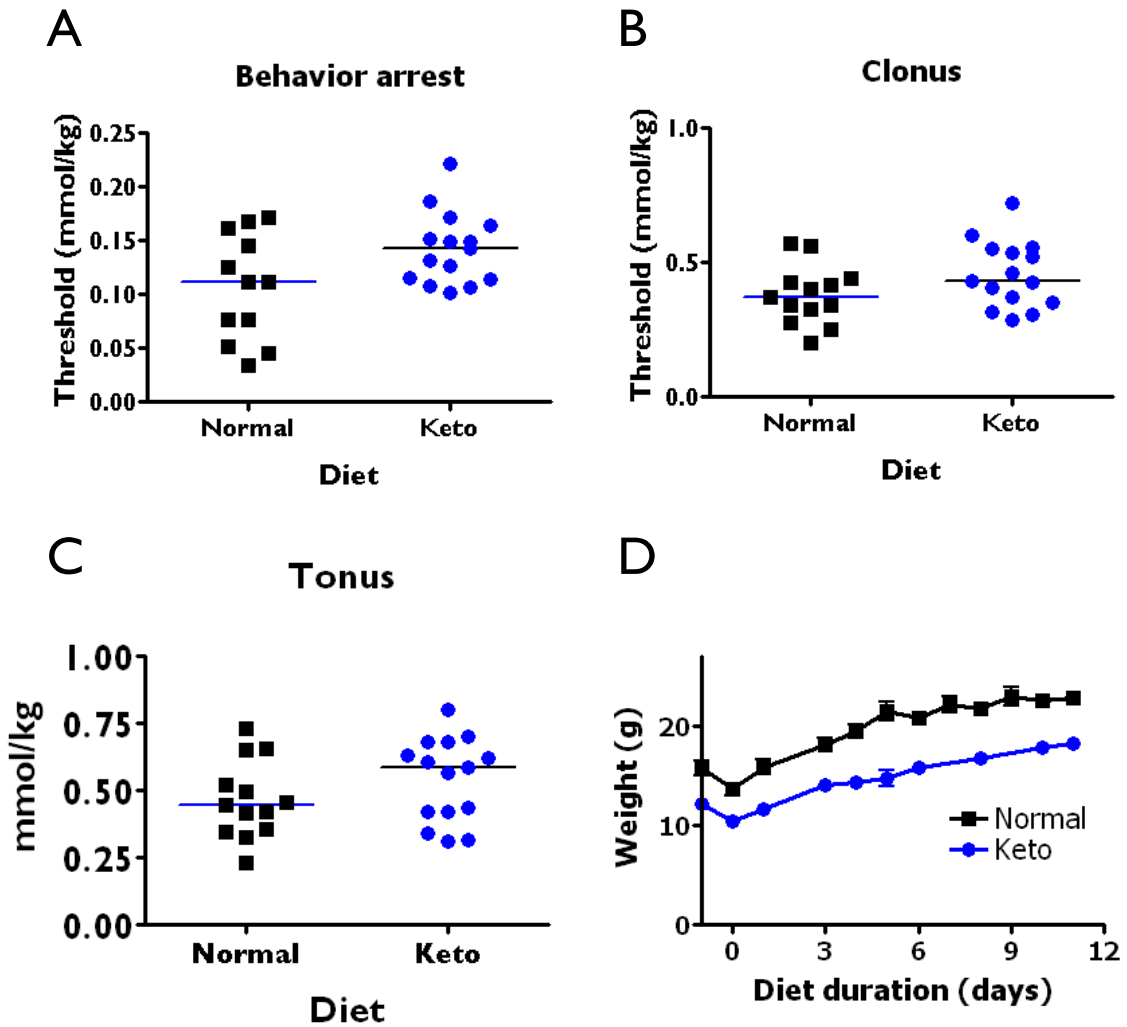

**Figure S3. The ketogenic diet does not protect against iv kainic acid-induced seizures.** (A) Threshold dose for behavior arrest (A), clonus (B), and tonus (C) ( $P = 0.03$  for behavior arrest but  $P > 0.05$  for others). Bars show the median for each group. Results presented are for mice fed as described in Figure 1 (Normal,  $n = 13$  mice; CR-IF,  $n = 15$ ), tested in 3 independent experiments. (D) Weights of animals shown in panels A-C (before animals were removed from each set for testing on days 11-17). (E) Body weights on the day of seizure testing for mice in panels A-C, mean +SEM; analyzed by Student's  $t$  test.

## ivKA test (not corrected for weight)

A

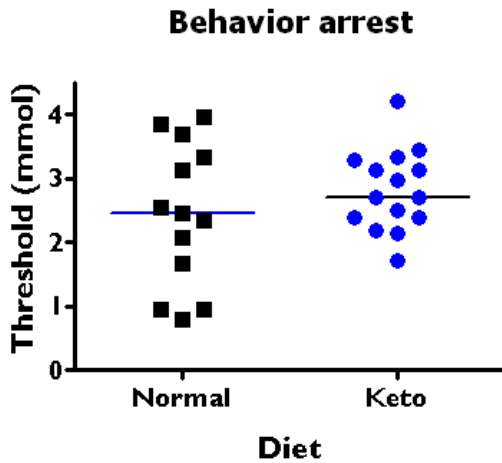

B

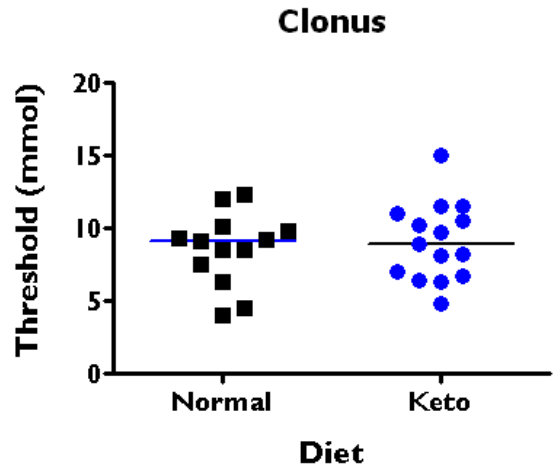

C

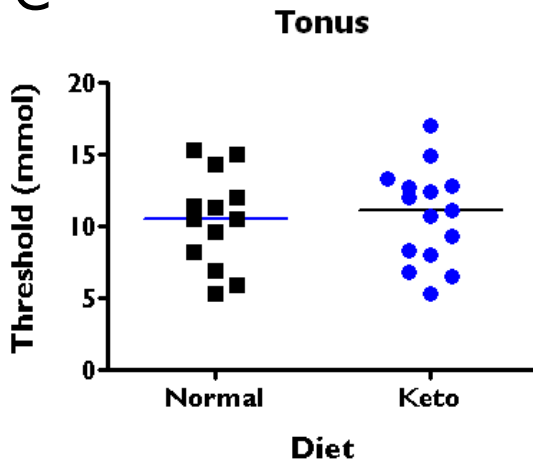

**Figure S4. The ketogenic diet does not protect against iv kainic acid-induced seizures (without thresholds being corrected for weight).** (A) Threshold dose for behavior arrest (A), clonus (B), and tonus (C) ( $P > 0.05$  for each). Bars show the median for each group. Results presented are for mice fed as described in Figure 1 (Normal,  $n = 13$  mice; Keto,  $n = 15$ ), tested in 3 independent experiments. Body weights are the same as in Fig. S3.

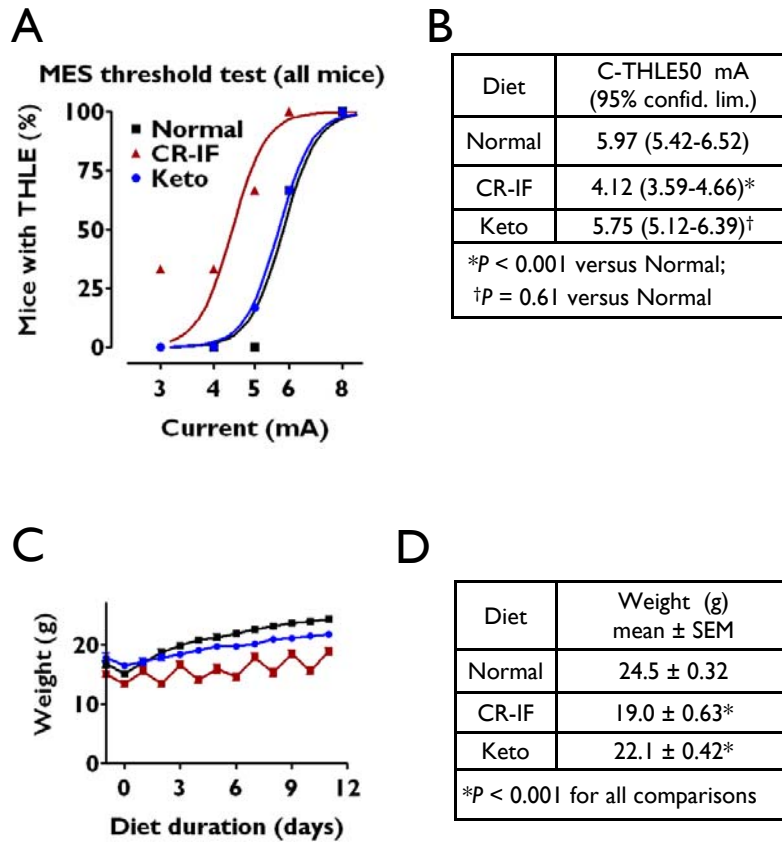

**Figure S5. Intermittent fasting is detrimental in the MES test.** (A) Probability of seizure events at the indicated currents was determined for all mice by a probit analysis. Results presented are for 3 independent animal cohorts in 3 independent experiments (Norm,  $n = 33$  mice; CR-IF,  $n = 24$ ; Keto,  $n = 29$ ). Because the curves shown represent a probability function, not all points lie on the curve. (B) The current where 50% of mice had tonic hindlimb extension (C-THLE50) was derived from data in panel A. (C) Weights of animals shown in panel A (before animals were removed from each set for testing on days 10-15). (D) Body weights on the day of seizure testing for mice in panel A, mean  $\pm$ SEM; analyzed by one-way ANOVA with Tukey's multiple comparison test.
